# Supplementary material for: COVID-19 Admission Rates and Changes in US Hospital Inpatient and Intensive Care Unit Occupancy
Source: PubMed Central journal article supplement (PMC10692846; doi:10.1001/jamahealthforum.2023.4206), 2023-12-01
Supplement: jamahealthforum-e234206-s001.pdf [file jamahealthforum-e234206-s001.pdf]

## Supplementary Online Content

Meille G, Decker SL, Owens PL, Selden TM. COVID-19 admission rates and changes in US hospital inpatient and intensive care unit occupancy. *JAMA Health Forum*. 2023;4(12):e234206. doi:10.1001/jamahealthforum.2023.4206

**eTable 1.** States Included in Each Analysis

**eTable 2.** Percent Distribution of Hospital-Weeks by COVID-19 Admission Rate per 100 Inpatient Beds and Hospital Type, 2020 Weeks 11 to 48

**eTable 3.** Percent Distribution of Hospital-Weeks by COVID-19 Admission Rate per 100 Inpatient Beds and State, 2020 Weeks 11 to 48

**eTable 4.** Changes in Inpatient Occupancy During 2020, Full Regression Results

**eTable 5.** Changes in Inpatient Occupancy During Low and High COVID-19 Admissions, Sample of 33 States With Data on Intensive Care Unit Admissions

**eTable 6.** Changes in Intensive Care Unit (ICU) Occupancy During 2020, Full Regression Results, Sample of 33 States With Data on ICU Admissions

**eTable 7.** Changes in Occupancy Rates and Thresholds During Low and High COVID-19 Admissions

**eTable 8.** Changes in Occupancy by Service Line During 2020, Full Regression Results

**eFigure 1.** Distribution of Duration of Periods With High COVID-19 Admissions

**eFigure 2.** Percentage of Hospitals With High COVID-19 Admission Rates by Week in 2020

This supplementary material has been provided by the authors to give readers additional information about their work.

**eTable 1. States Included in Each Analysis**

| Analysis                  | Number of States | List of States                                                                                                                                                                     |
|---------------------------|------------------|------------------------------------------------------------------------------------------------------------------------------------------------------------------------------------|
| Primary analysis          | 45               | AK, AR, AZ, CA, DC, DE, FL, GA, HI, IL, IN, IA, KS, KY, LA, MA, MD, ME, MI, MN, MO, MS, MT, NC, ND, NE, NH, NJ, NM, NV, NY, OH, OK, OR, RI, SC, SD, TN, TX, UT, VA, VT, WI, WV, WY |
| ICU analysis <sup>a</sup> | 33               | AK, AR, DE, GA, IL, KS, KY, LA, MA, MD, ME, MN, MO, MT, NC, ND, NE, NH, NJ, NM, NV, NY, OK, OR, SC, TN, TX, UT, VA, VT, WI, WV, WY                                                 |
| Only primary analysis     | 12               | AZ, CA, DC, FL, HI, IN, IA, MI, MS, OH, RI, SD                                                                                                                                     |
| No analyses <sup>b</sup>  | 6                | AL, CO, CT, ID, PA, WA                                                                                                                                                             |

<sup>a</sup> States were included in the ICU analysis if they reported revenue codes to the Agency for Healthcare Research and Quality, Healthcare Cost and Utilization Project (HCUP) State Inpatient Databases (SID) for 2019-2020

<sup>b</sup> States were not included in analyses if they did not provide data to HCUP or they did not provide exact admission dates.

**eTable 2.** Percent Distribution of Hospital-Weeks by COVID-19 Admission Rate per 100 Inpatient Beds and Hospital Type, 2020 Weeks 11 to 48<sup>a,b,c</sup>

|                                                                      | COVID-19<br>rate <1 | COVID-19<br>rate 1-4 | COVID-19<br>rate 5-10 | COVID-19<br>rate 10-14 | COVID-19<br>rate 15+ | Number of<br>Hospitals |
|----------------------------------------------------------------------|---------------------|----------------------|-----------------------|------------------------|----------------------|------------------------|
| All hospitals                                                        |                     |                      |                       |                        |                      |                        |
| All hospitals                                                        | 20.0                | 43.9                 | 20.2                  | 8.0                    | 7.9                  | 3,960                  |
| Time period                                                          |                     |                      |                       |                        |                      |                        |
| Weeks 11-26                                                          | 30.5                | 44.0                 | 14.3                  | 5.0                    | 6.1                  | 3,960                  |
| Weeks 27-48                                                          | 12.3                | 43.8                 | 24.5                  | 10.1                   | 9.2                  | 3,960                  |
| Hospital location                                                    |                     |                      |                       |                        |                      |                        |
| Metro, large central                                                 | 14.5                | 48.4                 | 21.4                  | 8.0                    | 7.7                  | 751                    |
| Metro, other                                                         | 20.1                | 43.2                 | 20.3                  | 8.2                    | 8.2                  | 1,624                  |
| Micropolitan                                                         | 38.0                | 31.1                 | 16.2                  | 7.4                    | 7.3                  | 641                    |
| Rural, non-core                                                      | 59.2                | 19.3                 | 9.9                   | 4.9                    | 6.7                  | 944                    |
| All hospitals, weighted by admissions by race/ethnicity <sup>c</sup> |                     |                      |                       |                        |                      |                        |
| Hispanic                                                             | 15.1                | 41.9                 | 23.2                  | 9.4                    | 10.4                 | 3,693                  |
| Non-Hispanic Black                                                   | 13.9                | 46.7                 | 22.5                  | 8.7                    | 8.1                  | 3,693                  |
| Non-Hispanic White                                                   | 22.2                | 43.5                 | 19.1                  | 7.7                    | 7.5                  | 3,693                  |
| Other race <sup>e</sup>                                              | 18.2                | 45.8                 | 20.4                  | 7.3                    | 8.4                  | 3,693                  |

<sup>a</sup> Data are from the Agency for Healthcare Research and Quality Healthcare Cost and Utilization Project State Inpatient Databases (2019-2020) for 45 US states.

<sup>b</sup> All distributions calculated using hospital level weights equal to the number of admissions in 2019.

<sup>c</sup> For each panel the reference category is the first one listed. For all other categories, the difference between their distribution and that of the reference category is statistically significant at the 1% level.

<sup>d</sup> Distributions weighted by number of admissions in 2019 by race/ethnicity. Analyses related to patient race and ethnicity excluded 5 states that had more than 5% of these data missing (Louisiana, Montana, North Dakota, Nebraska, and West Virginia).

<sup>e</sup> Other includes non-Hispanic American Indian or Alaska Native, Asian or Pacific Islander, or multiple races or ethnicities.

**eTable 3.** Percent Distribution of Hospital-Weeks by COVID-19 Admission Rate per 100 Inpatient Beds and State, 2020 Weeks 11 to 48<sup>a,b</sup>

| State           | COVID-19 rate <1 | COVID-19 rate 1-4 | COVID-19 rate 5-10 | COVID-19 rate 10-14 | COVID-19 rate 15+ | Number of Hospitals |
|-----------------|------------------|-------------------|--------------------|---------------------|-------------------|---------------------|
| AK              | 50.5             | 30.8              | 11.9               | 4.9                 | 1.8               | 21                  |
| AR              | 30.4             | 35.7              | 23.8               | 5.9                 | 4.2               | 74                  |
| AZ              | 13.8             | 45.0              | 19.9               | 8.9                 | 12.4              | 64                  |
| CA              | 15.9             | 46.0              | 25.1               | 7.6                 | 5.4               | 331                 |
| DC              | 10.1             | 60.1              | 15.9               | 9.4                 | 4.5               | 7                   |
| DE              | 8.7              | 57.8              | 22.5               | 6.5                 | 4.4               | 6                   |
| FL <sup>c</sup> | sup.             | sup.              | sup.               | sup.                | sup.              | 179                 |
| GA              | 7.5              | 36.2              | 33.1               | 14.6                | 8.7               | 129                 |
| HI              | 52.8             | 31.4              | 10.6               | 4.4                 | 0.9               | 21                  |
| IA              | 21.5             | 45.3              | 17.9               | 7.7                 | 7.6               | 115                 |
| IL              | 13.3             | 43.0              | 18.6               | 12.1                | 12.9              | 175                 |
| IN              | 16.5             | 50.8              | 18.1               | 7.1                 | 7.5               | 115                 |
| KS              | 28.9             | 46.7              | 13.5               | 4.7                 | 6.3               | 118                 |
| KY              | 28.3             | 47.6              | 15.2               | 5.8                 | 3.1               | 92                  |
| LA              | 9.5              | 44.7              | 29.4               | 10.2                | 6.3               | 78                  |
| MA              | 22.4             | 44.8              | 15.2               | 7.6                 | 10.1              | 61                  |
| MD              | 7.8              | 44.5              | 27.3               | 10.3                | 10.0              | 45                  |
| ME              | 67.3             | 29.7              | 2.5                | 0.4                 | 0.1               | 33                  |
| MI              | 23.4             | 47.4              | 11.8               | 7.2                 | 10.2              | 122                 |
| MN              | 24.6             | 42.6              | 19.0               | 5.7                 | 8.2               | 125                 |
| MO              | 25.8             | 42.7              | 17.5               | 7.9                 | 6.1               | 108                 |
| MS              | 11.6             | 41.4              | 32.2               | 8.9                 | 6.0               | 88                  |
| MT              | 48.6             | 20.0              | 14.6               | 7.0                 | 9.9               | 42                  |
| NC              | 15.1             | 52.2              | 24.6               | 6.2                 | 1.8               | 102                 |
| ND              | 31.1             | 37.2              | 11.3               | 7.6                 | 12.7              | 16                  |
| NE              | 25.6             | 45.7              | 16.2               | 5.3                 | 7.2               | 86                  |
| NH              | 55.1             | 35.2              | 8.3                | 1.1                 | 0.3               | 26                  |
| NJ              | 16.7             | 44.6              | 15.2               | 9.7                 | 13.8              | 64                  |
| NM              | 20.9             | 46.0              | 14.1               | 5.5                 | 13.6              | 35                  |
| NV              | 6.1              | 37.4              | 24.0               | 15.5                | 17.1              | 34                  |
| NY              | 27.9             | 46.8              | 10.8               | 3.6                 | 10.9              | 158                 |
| OH              | 24.2             | 51.0              | 14.0               | 4.3                 | 6.5               | 155                 |
| OK              | 30.5             | 35.5              | 23.9               | 5.8                 | 4.4               | 111                 |
| OR              | 47.6             | 42.9              | 6.4                | 2.0                 | 1.0               | 60                  |
| RI              | 16.6             | 46.8              | 17.6               | 9.9                 | 9.1               | 10                  |
| SC              | 15.4             | 42.5              | 26.4               | 10.9                | 4.8               | 59                  |
| SD              | 27.1             | 38.3              | 13.9               | 10.5                | 10.2              | 50                  |
| TN              | 21.4             | 41.6              | 22.8               | 8.5                 | 5.7               | 98                  |
| TX              | 16.7             | 36.0              | 24.9               | 10.9                | 11.4              | 407                 |
| UT              | 20.6             | 43.6              | 23.4               | 6.9                 | 5.4               | 48                  |
| VA              | 15.1             | 57.4              | 18.3               | 5.6                 | 3.5               | 81                  |
| VT              | 83.4             | 15.6              | 0.9                | 0.1                 | 0.1               | 14                  |
| WI              | 26.3             | 40.0              | 15.4               | 8.0                 | 10.3              | 129                 |
| WV              | 51.2             | 34.6              | 11.8               | 1.4                 | 1.0               | 45                  |
| WY              | 69.4             | 17.1              | 6.1                | 2.2                 | 5.2               | 23                  |

<sup>a</sup> Data are from the Agency for Healthcare Research and Quality Healthcare Cost and Utilization Project State Inpatient Databases (2019-2020) for 45 US states.

<sup>b</sup> All distributions calculated using hospital level weights equal to the number of admissions in 2019.

<sup>c</sup> Distribution in Florida suppressed (sup.) because of disclosure restrictions.

**eTable 4.** Changes in Inpatient Occupancy During 2020, Full Regression ResultsPanel A. All hospitals, weeks 11-26, and weeks 27-48<sup>a,b</sup>

|                                      | All hospitals                                              | Weeks 11-26               | Weeks 27-48            |
|--------------------------------------|------------------------------------------------------------|---------------------------|------------------------|
|                                      | Percentage-point change in occupancy per 100 beds (95% CI) |                           |                        |
| Weeks 1-10*COVID <sup>c</sup> <1     | 0.6<br>(0.3 to 0.9)                                        | N/A                       | N/A                    |
| Weeks 1-10*COVID <sup>c</sup> ≥1     | 0.3<br>(-1.0 to 1.6)                                       | N/A                       | N/A                    |
| Weeks 11-48*COVID <sup>c</sup> <1    | -9.3<br>(-9.8 to -8.9)                                     | -11.6<br>(-12.0 to -11.2) | -5.2<br>(-6.0 to -4.5) |
| Weeks 11-48*COVID <sup>c</sup> 1-4   | -6.7<br>(-7.1 to -6.3)                                     | -12.2<br>(-12.6 to -11.7) | -2.7<br>(-3.2 to -2.3) |
| Weeks 11-48*COVID <sup>c</sup> 5-10  | -2.8<br>(-3.2 to -2.3)                                     | -10.0<br>(-10.7 to -9.3)  | 0.3<br>(-0.1 to 0.7)   |
| Weeks 11-48*COVID <sup>c</sup> 10-15 | 0.3<br>(-0.2 to 0.9)                                       | -7.7<br>(-8.9 to -6.6)    | 3.3<br>(2.8 to 3.7)    |
| Weeks 11-48*COVID <sup>c</sup> 15+   | 5.8<br>(5.0 to 6.6)                                        | -1.1<br>(-2.5 to 0.3)     | 9.1<br>(8.4 to 9.7)    |
| Mean of occupancy in 2019            | 73.4                                                       | 73.4                      | 72.2                   |
| N                                    | 374880                                                     | 124960                    | 171820                 |

<sup>a</sup> Data are from the Agency for Healthcare Research and Quality Healthcare Cost and Utilization Project State Inpatient Databases (2019-2020) for 45 US states.

<sup>b</sup> Regressions compared outcomes for each hospital-week of 2020 to the corresponding hospital-week in 2019, i.e., regression models included hospital-week fixed effects. Means and regressions were weighted by the number of admissions for each hospital in 2019.

<sup>c</sup> COVID denotes weekly COVID-19 admissions per 100 beds.

Panel B. Urbanicity of hospital county<sup>a,b</sup>

|                                      | Metro,<br>large central                                    | Metro, other             | Micropolitan           | Rural,<br>non-core     |
|--------------------------------------|------------------------------------------------------------|--------------------------|------------------------|------------------------|
|                                      | Percentage-point change in occupancy per 100 beds (95% CI) |                          |                        |                        |
| Weeks 1-10*COVID <sup>c</sup> <1     | 0.9<br>(0.4 to 1.5)                                        | 0.6<br>(0.1 to 1.0)      | -0.7<br>(-1.3 to -0.0) | -0.9<br>(-2.1 to 0.4)  |
| Weeks 1-10*COVID <sup>c</sup> ≥1     | -1.3<br>(-3.1 to 0.6)                                      | 1.2<br>(-0.6 to 2.9)     | 1.6<br>(-2.7 to 5.9)   | 1.9<br>(-6.8 to 10.6)  |
| Weeks 11-48*COVID <sup>c</sup> <1    | -9.2<br>(-10.0 to -8.3)                                    | -10.3<br>(-11.0 to -9.7) | -7.4<br>(-8.1 to -6.7) | -5.6<br>(-6.3 to -5.0) |
| Weeks 11-48*COVID <sup>c</sup> 1-4   | -7.5<br>(-8.2 to -6.9)                                     | -6.3<br>(-6.7 to -5.9)   | -4.3<br>(-5.1 to -3.5) | -4.3<br>(-6.1 to -2.6) |
| Weeks 11-48*COVID <sup>c</sup> 5-10  | -4.4<br>(-5.1 to -3.7)                                     | -1.8<br>(-2.4 to -1.2)   | 0.0<br>(-0.9 to 0.8)   | -1.6<br>(-3.9 to 0.8)  |
| Weeks 11-48*COVID <sup>c</sup> 10-15 | -1.6<br>(-2.6 to -0.5)                                     | 1.2<br>(0.5 to 1.9)      | 4.2<br>(3.2 to 5.1)    | 0.9<br>(-2.2 to 4.0)   |
| Weeks 11-48*COVID <sup>c</sup> 15+   | 4.5<br>(2.8 to 6.1)                                        | 6.0<br>(5.1 to 6.9)      | 10.1<br>(8.5 to 11.8)  | 10.0<br>(6.2 to 13.7)  |
| Mean of occupancy in 2019            | 77.8                                                       | 74.3                     | 51.9                   | 36.5                   |
| N                                    | 70848                                                      | 153792                   | 60864                  | 89376                  |

<sup>a</sup> Data are from the Agency for Healthcare Research and Quality Healthcare Cost and Utilization Project State Inpatient Databases (2019-2020) for 45 US states.

<sup>b</sup> Regressions compared outcomes for each hospital-week of 2020 to the corresponding hospital-week in 2019, i.e., regression models included hospital-week fixed effects. Means and regressions were weighted by the number of admissions for each hospital in 2019.

<sup>c</sup> COVID denotes weekly COVID-19 admissions per 100 beds.

Panel C. All hospitals, weighted by admissions by race/ethnicity<sup>a,b,d</sup>

|                                      | Hispanic                                                   | Non-Hispanic<br>Black  | Non-Hispanic<br>White   | Other <sup>e</sup>      |
|--------------------------------------|------------------------------------------------------------|------------------------|-------------------------|-------------------------|
|                                      | Percentage-point change in occupancy per 100 beds (95% CI) |                        |                         |                         |
| Weeks 1-10*COVID <sup>c</sup> <1     | 0.9<br>(0.4 to 1.4)                                        | 0.7<br>(0.4 to 1.0)    | 1.0<br>(0.6 to 1.5)     | 0.7<br>(0.3 to 1.2)     |
| Weeks 1-10*COVID <sup>c</sup> ≥1     | 0.5<br>(-1.4 to 2.3)                                       | 0.3<br>(-1.3 to 1.9)   | -0.3<br>(-1.6 to 0.9)   | -1.1<br>(-2.5 to 0.4)   |
| Weeks 11-48*COVID <sup>c</sup> <1    | -9.3<br>(-10.0 to -8.6)                                    | -9.4<br>(-9.8 to -8.9) | -9.9<br>(-10.5 to -9.2) | -9.6<br>(-10.3 to -8.9) |
| Weeks 11-48*COVID <sup>c</sup> 1-4   | -6.8<br>(-7.4 to -6.3)                                     | -6.6<br>(-6.9 to -6.2) | -7.5<br>(-8.2 to -6.9)  | -7.5<br>(-8.3 to -6.7)  |
| Weeks 11-48*COVID <sup>c</sup> 5-10  | -3.0<br>(-3.6 to -2.3)                                     | -2.3<br>(-2.7 to -1.9) | -4.1<br>(-4.8 to -3.4)  | -4.3<br>(-5.1 to -3.5)  |
| Weeks 11-48*COVID <sup>c</sup> 10-15 | -0.3<br>(-1.1 to 0.5)                                      | 1.0<br>(0.4 to 1.5)    | -0.6<br>(-1.5 to 0.2)   | -1.4<br>(-2.3 to -0.4)  |
| Weeks 11-48*COVID <sup>c</sup> 15+   | 4.7<br>(3.4 to 6.0)                                        | 5.8<br>(5.0 to 6.6)    | 6.7<br>(5.5 to 8.0)     | 4.4<br>(2.9 to 5.8)     |
| Mean of occupancy in 2019            | 75.1                                                       | 75.9                   | 72.6                    | 75.9                    |
| N                                    | 316800                                                     | 347424                 | 305088                  | 317376                  |

<sup>a</sup> Data are from the Agency for Healthcare Research and Quality Healthcare Cost and Utilization Project State Inpatient Databases (2019-2020) for 45 US states.

<sup>b</sup> Regressions compared outcomes for each hospital-week of 2020 to the corresponding hospital-week in 2019, i.e., regression models included hospital-week fixed effects. Means and regressions were weighted by the number of admissions for each hospital in 2019.

<sup>c</sup> COVID denotes weekly COVID-19 admissions per 100 beds.

<sup>d</sup> States without ICU data and states missing more than 5% of data on race/ethnicity excluded (Louisiana, Montana, North Dakota, Nebraska, and West Virginia).

**eTable 5.** Changes in Inpatient Occupancy During Low and High COVID-19 Admissions, Sample of 33 States With Data on Intensive Care Unit Admissions<sup>a,b,c</sup>

|                                                                     | 2019 occupancy (per 100 beds), mean | Change during low COVID-19 <sup>d</sup>                    | Change during high COVID-19 <sup>e</sup> |
|---------------------------------------------------------------------|-------------------------------------|------------------------------------------------------------|------------------------------------------|
|                                                                     |                                     | Percentage-point change in occupancy per 100 beds (95% CI) |                                          |
| All hospitals                                                       |                                     |                                                            |                                          |
| All hospitals                                                       | 73.5                                | -9.2<br>(-9.8 to -8.6)                                     | 5.1<br>(4.1 to 6.2)                      |
| Time period                                                         |                                     |                                                            |                                          |
| Weeks 11-26                                                         | 73.4                                | -11.5<br>(-12.1 to -11.0)                                  | -0.9<br>(-2.5 to 0.6)                    |
| Weeks 27-48                                                         | 72.5                                | -5.5<br>(-6.5 to -4.5)                                     | 9.0<br>(8.1 to 9.8)                      |
| Hospital location                                                   |                                     |                                                            |                                          |
| Metro, large central                                                | 79.9                                | -8.8<br>(-10.0 to -7.5)                                    | 3.9<br>(1.8 to 6.1)                      |
| Metro, other                                                        | 74.1                                | -10.2<br>(-11.1 to -9.4)                                   | 5.3<br>(4.1 to 6.4)                      |
| Micropolitan                                                        | 52.6                                | -7.3<br>(-8.1 to -6.4)                                     | 9.2<br>(7.9 to 10.6)                     |
| Rural, non-core                                                     | 37.5                                | -5.7<br>(-6.5 to -4.9)                                     | 10.2<br>(5.5 to 14.9)                    |
| All hospitals, weighted by admission by race/ethnicity <sup>f</sup> |                                     |                                                            |                                          |
| Hispanic                                                            | 74.9                                | -9.4<br>(-10.4 to -8.5)                                    | 5.3<br>(3.7 to 6.9)                      |
| Non-Hispanic Black                                                  | 76.2                                | -9.1<br>(-10.1 to -8.2)                                    | 4.5<br>(3.0 to 6.0)                      |
| Non-Hispanic White                                                  | 73.0                                | -9.3<br>(-9.9 to -8.7)                                     | 5.1<br>(4.1 to 6.1)                      |
| Other race <sup>g</sup>                                             | 76.4                                | -9.0<br>(-9.9 to -8.0)                                     | 4.1<br>(2.3 to 6.0)                      |

<sup>a</sup> Data are from the Agency for Healthcare Research and Quality Healthcare Cost and Utilization Project State Inpatient Databases (2019-2020) for 33 US states.

<sup>b</sup> Changes compared outcomes for each hospital-week in weeks 11-48 of 2020 to the corresponding hospital-week in 2019, i.e., regression models included hospital-week fixed effects.

<sup>c</sup> Means and regressions were weighted by the number of admissions for each hospital in 2019.

<sup>d</sup> Low COVID-19 admission rate corresponds to less than 1 weekly COVID-19 admission per 100 beds.

<sup>e</sup> High COVID-19 admission rate corresponds to 15 or more weekly COVID-19 admissions per 100 beds.



- <sup>f</sup> Regressions weighted by number of admissions in 2019 by race/ethnicity. States with more than 5% of data on race/ethnicity excluded (Louisiana, Montana, North Dakota, Nebraska, and West Virginia).
- <sup>g</sup> Other includes non-Hispanic American Indian or Alaska Native, Asian or Pacific Islander, or multiple races or ethnicities.

**eTable 6.** Changes in Intensive Care Unit (ICU) Occupancy During 2020, Full Regression Results, Sample of 33 States With Data on ICU Admissions

Panel A. All hospitals, weeks 11-26, and weeks 27-48<sup>a,c</sup>

|                                      | All hospitals                                 | Weeks 11-26            | Weeks 27-48            |
|--------------------------------------|-----------------------------------------------|------------------------|------------------------|
|                                      | Percentage-point change in occupancy (95% CI) |                        |                        |
| Weeks 1-10*COVID <sup>c</sup> <1     | 0.6<br>(-0.1 to 1.4)                          | N/A                    | N/A                    |
| Weeks 1-10*COVID <sup>c</sup> ≥1     | -0.6<br>(-3.3 to 2.1)                         | N/A                    | N/A                    |
| Weeks 11-48*COVID <sup>c</sup> <1    | -3.1<br>(-4.0 to -2.2)                        | -4.9<br>(-5.9 to -3.9) | -0.1<br>(-1.6 to 1.3)  |
| Weeks 11-48*COVID <sup>c</sup> 1-4   | 4.1<br>(3.1 to 5.1)                           | 1.7<br>(0.6 to 2.8)    | 5.8<br>(4.5 to 7.0)    |
| Weeks 11-48*COVID <sup>c</sup> 5-10  | 13.6<br>(12.2 to 15.1)                        | 12.5<br>(10.3 to 14.8) | 14.1<br>(12.6 to 15.7) |
| Weeks 11-48*COVID <sup>c</sup> 10-15 | 20.3<br>(18.5 to 22.1)                        | 23.7<br>(20.2 to 27.3) | 18.9<br>(17.1 to 20.8) |
| Weeks 11-48*COVID <sup>c</sup> 15+   | 38.9<br>(34.7 to 43.2)                        | 53.4<br>(45.4 to 61.3) | 29.7<br>(26.0 to 33.3) |
| Mean of occupancy in 2019            | 57.4                                          | 57.6                   | 55.8                   |
| N                                    | 180672                                        | 60224                  | 82808                  |

<sup>a</sup> Data are from the Agency for Healthcare Research and Quality Healthcare Cost and Utilization Project State Inpatient Databases (2019-2020) for 33 US states.

<sup>b</sup> Regressions compared outcomes for each hospital-week of 2020 to the corresponding hospital-week in 2019, i.e., regression models included hospital-week fixed effects. Means and regressions were weighted by the number of admissions for each hospital in 2019.

<sup>c</sup> COVID denotes weekly COVID-19 admissions per 100 beds.

Panel B. Urbanicity of hospital county<sup>a,b</sup>

|                                      | Metro,<br>large central                                    | Metro, other           | Micropolitan           | Rural,<br>non-core     |
|--------------------------------------|------------------------------------------------------------|------------------------|------------------------|------------------------|
|                                      | Percentage-point change in occupancy per 100 beds (95% CI) |                        |                        |                        |
| Weeks 1-10*COVID <sup>c</sup> <1     | 0.1<br>(-1.3 to 1.5)                                       | 0.9<br>(-0.1 to 1.8)   | 1.0<br>(-0.4 to 2.4)   | 0.0<br>(-3.2 to 3.2)   |
| Weeks 1-10*COVID <sup>c</sup> ≥1     | -2.6<br>(-8.4 to 3.2)                                      | 0.1<br>(-2.9 to 3.1)   | 2.2<br>(-5.7 to 10.1)  | 3.8<br>(-6.2 to 13.7)  |
| Weeks 11-48*COVID <sup>c</sup> <1    | -2.2<br>(-5.0 to 0.7)                                      | -3.9<br>(-4.9 to -2.8) | -1.3<br>(-2.7 to 0.1)  | -3.1<br>(-4.3 to -2.0) |
| Weeks 11-48*COVID <sup>c</sup> 1-4   | 3.7<br>(1.8 to 5.7)                                        | 4.1<br>(2.9 to 5.3)    | 6.3<br>(4.3 to 8.2)    | 2.1<br>(-0.5 to 4.8)   |
| Weeks 11-48*COVID <sup>c</sup> 5-10  | 13.0<br>(10.0 to 16.1)                                     | 14.1<br>(12.4 to 15.8) | 13.5<br>(10.0 to 17.0) | 8.2<br>(4.6 to 11.9)   |
| Weeks 11-48*COVID <sup>c</sup> 10-15 | 19.7<br>(16.3 to 23.1)                                     | 21.4<br>(19.0 to 23.7) | 15.9<br>(12.8 to 19.0) | 12.6<br>(5.4 to 19.8)  |
| Weeks 11-48*COVID <sup>c</sup> 15+   | 41.6<br>(33.8 to 49.3)                                     | 39.4<br>(33.8 to 45.0) | 25.3<br>(20.0 to 30.5) | 15.1<br>(9.3 to 20.9)  |
| Mean of occupancy in 2019            | 63.7                                                       | 56.5                   | 42.7                   | 30.2                   |
| N                                    | 33504                                                      | 86112                  | 34848                  | 26208                  |

<sup>a</sup> Data are from the Agency for Healthcare Research and Quality Healthcare Cost and Utilization Project State Inpatient Databases (2019-2020) for 33 US states.

<sup>b</sup> Regressions compared outcomes for each hospital-week of 2020 to the corresponding hospital-week in 2019, i.e., regression models included hospital-week fixed effects. Means and regressions were weighted by the number of admissions for each hospital in 2019.

<sup>c</sup> COVID denotes weekly COVID-19 admissions per 100 beds.

Panel C. All hospitals, weighted by admissions by race/ethnicity<sup>a,b,d</sup>

|                                      | Hispanic                                                   | Non-Hispanic Black     | Non-Hispanic White     | Other                  |
|--------------------------------------|------------------------------------------------------------|------------------------|------------------------|------------------------|
|                                      | Percentage-point change in occupancy per 100 beds (95% CI) |                        |                        |                        |
| Weeks 1-10*COVID <sup>c</sup> <1     | 1.9<br>(0.5 to 3.4)                                        | 0.7<br>(-0.3 to 1.7)   | 0.8<br>(0.0 to 1.5)    | -0.1<br>(-1.3 to 1.1)  |
| Weeks 1-10*COVID <sup>c</sup> ≥1     | 2.7<br>(-3.7 to 9.1)                                       | -1.0<br>(-4.4 to 2.4)  | -0.2<br>(-2.9 to 2.6)  | -4.2<br>(-7.9 to -0.4) |
| Weeks 11-48*COVID <sup>c</sup> <1    | -1.8<br>(-3.8 to 0.2)                                      | -2.8<br>(-4.5 to -1.1) | -3.5<br>(-4.4 to -2.6) | -2.5<br>(-4.0 to -1.0) |
| Weeks 11-48*COVID <sup>c</sup> 1-4   | 4.4<br>(2.6 to 6.3)                                        | 5.0<br>(3.2 to 6.8)    | 3.6<br>(2.7 to 4.6)    | 3.0<br>(1.2 to 4.7)    |
| Weeks 11-48*COVID <sup>c</sup> 5-10  | 17.3<br>(13.4 to 21.3)                                     | 14.2<br>(11.7 to 16.8) | 12.8<br>(11.5 to 14.1) | 13.6<br>(11.1 to 16.1) |
| Weeks 11-48*COVID <sup>c</sup> 10-15 | 25.1<br>(21.4 to 28.8)                                     | 19.6<br>(17.2 to 22.1) | 19.5<br>(17.8 to 21.3) | 21.9<br>(19.0 to 24.9) |
| Weeks 11-48*COVID <sup>c</sup> 15+   | 53.7<br>(43.8 to 63.6)                                     | 37.8<br>(33.3 to 42.4) | 34.7<br>(30.7 to 38.7) | 47.3<br>(40.8 to 53.8) |
| Mean of occupancy in 2019            | 59.7                                                       | 60.2                   | 56.2                   | 57.8                   |
| N                                    | 150624                                                     | 160608                 | 164448                 | 160416                 |

<sup>a</sup> Data are from the Agency for Healthcare Research and Quality Healthcare Cost and Utilization Project State Inpatient Databases (2019-2020) for 33 US states.

<sup>b</sup> Regressions compared outcomes for each hospital-week of 2020 to the corresponding hospital-week in 2019, i.e., regression models included hospital-week fixed effects. Means and regressions were weighted by the number of admissions for each hospital in 2019.

<sup>c</sup> COVID denotes weekly COVID-19 admissions per 100 beds.

<sup>d</sup> States without ICU data and states missing more than 5% of data on race/ethnicity excluded (Louisiana, Montana, North Dakota, Nebraska, and West Virginia).

<sup>e</sup> Other includes non-Hispanic American Indian or Alaska Native, Asian or Pacific Islander, or multiple races or ethnicities.

**eTable 7.** Changes in Occupancy Rates and Thresholds During Low and High COVID-19 Admissions

|                                        | 2019, mean | Low COVID-19 admission rate <sup>e</sup> | High COVID-19 admission rate <sup>f</sup> |
|----------------------------------------|------------|------------------------------------------|-------------------------------------------|
|                                        |            | Percentage-point change (95% CI)         |                                           |
| Inpatient occupancy <sup>c</sup>       | 73.4       | -9.3<br>(-9.8 to -8.9)                   | 5.8<br>(5.0 to 6.6)                       |
| Inpatient occupancy <sup>c</sup> ≥ 75% | 49.5       | -17.5<br>(-19.3 to -15.7)                | 10.3<br>(7.9 to 12.7)                     |
| Inpatient occupancy <sup>c</sup> ≥ 90% | 18.2       | -7.4<br>(-9.0 to -5.7)                   | 5.5<br>(2.8 to 8.3)                       |
| ICU occupancy <sup>d</sup>             | 57.4       | -3.1<br>(-4.0 to -2.2)                   | 38.9<br>(34.7 to 43.2)                    |
| ICU occupancy <sup>d</sup> ≥ 75%       | 19.6       | -2.0<br>(-3.9 to -0.2)                   | 49.2<br>(45.7 to 52.7)                    |
| ICU occupancy <sup>d</sup> ≥ 90%       | 0.7        | 2.1<br>(1.0 to 3.1)                      | 44.5<br>(40.5 to 48.4)                    |

<sup>a</sup> Data are from the Agency for Healthcare Research and Quality Healthcare Cost and Utilization Project State Inpatient Databases (2019-2020).

<sup>b</sup> Regressions compared outcomes for each hospital-week of 2020 to the corresponding hospital-week in 2019, i.e., regression models included hospital-week fixed effects. Means and regressions were weighted by the number of admissions for each hospital in 2019.

<sup>c</sup> Inpatient occupancy measured per 100 beds and estimated using data from 45 states.

<sup>d</sup> ICU occupancy measured per 100 beds and estimated using data from 33 states.

<sup>e</sup> Low COVID-19 admission rate corresponds to less than 1 weekly COVID-19 admission per 100 beds.

<sup>f</sup> High COVID-19 admission rate corresponds to 15 or more weekly COVID-19 admissions per 100 beds.

**eTable 8.** Changes in Occupancy by Service Line During 2020, Full Regression Results<sup>a,b</sup>

|                                          | Maternal                                                   | M/SUD <sup>d</sup>     | Injury                 | Surgical               | Medical                |
|------------------------------------------|------------------------------------------------------------|------------------------|------------------------|------------------------|------------------------|
|                                          | Percentage-point change in occupancy per 100 beds (95% CI) |                        |                        |                        |                        |
| Weeks 1-10*<br>COVID <sup>c</sup> <1     | 0.0<br>(-0.1 to 0.1)                                       | 0.0<br>(-0.0 to 0.1)   | 0.1<br>(0.0 to 0.1)    | -0.2<br>(-0.3 to -0.1) | 0.7<br>(0.5 to 0.9)    |
| Weeks 1-10*<br>COVID <sup>c</sup> ≥1     | -0.2<br>(-0.7 to 0.3)                                      | 0.2<br>(-0.1 to 0.5)   | -0.1<br>(-0.2 to 0.1)  | -0.6<br>(-1.1 to -0.0) | 1.0<br>(0.1 to 1.9)    |
| Weeks 11-26*<br>COVID <sup>c</sup> <1    | -0.6<br>(-0.7 to -0.5)                                     | -0.7<br>(-0.8 to -0.6) | -0.4<br>(-0.4 to -0.3) | -3.7<br>(-3.9 to -3.5) | -7.5<br>(-7.7 to -7.2) |
| Weeks 11-26*<br>COVID <sup>c</sup> 1-4   | -0.9<br>(-1.0 to -0.7)                                     | -0.7<br>(-0.8 to -0.6) | -0.5<br>(-0.5 to -0.4) | -4.6<br>(-4.8 to -4.4) | -6.8<br>(-7.0 to -6.5) |
| Weeks 11-26*<br>COVID <sup>c</sup> 5-10  | -0.9<br>(-1.0 to -0.7)                                     | -0.9<br>(-1.1 to -0.8) | -0.6<br>(-0.7 to -0.5) | -5.1<br>(-5.4 to -4.8) | -3.9<br>(-4.3 to -3.5) |
| Weeks 11-26*<br>COVID <sup>c</sup> 10-15 | -0.9<br>(-1.1 to -0.7)                                     | -1.3<br>(-1.5 to -1.0) | -0.8<br>(-0.9 to -0.7) | -6.0<br>(-6.6 to -5.4) | -0.2<br>(-0.9 to 0.5)  |
| Weeks 11-26*<br>COVID <sup>c</sup> 15+   | -1.1<br>(-1.3 to -0.8)                                     | -2.3<br>(-2.8 to -1.9) | -1.2<br>(-1.3 to -1.0) | -8.5<br>(-9.3 to -7.6) | 10.7<br>(9.5 to 11.9)  |
| Weeks 27-48*<br>COVID <sup>c</sup> <1    | -0.9<br>(-1.1 to -0.7)                                     | -0.4<br>(-0.7 to -0.2) | 0.0<br>(-0.1 to 0.1)   | -1.2<br>(-1.4 to -1.0) | -3.3<br>(-3.7 to -2.9) |
| Weeks 27-48*<br>COVID <sup>c</sup> 1-4   | -0.9<br>(-1.1 to -0.8)                                     | -0.3<br>(-0.4 to -0.2) | 0.1<br>(0.0 to 0.2)    | -0.8<br>(-1.0 to -0.7) | -1.2<br>(-1.5 to -0.9) |
| Weeks 27-48*<br>COVID <sup>c</sup> 5-10  | -0.9<br>(-1.0 to -0.8)                                     | -0.4<br>(-0.5 to -0.3) | 0.1<br>(0.0 to 0.1)    | -1.0<br>(-1.2 to -0.9) | 2.2<br>(1.9 to 2.4)    |
| Weeks 27-48*<br>COVID <sup>c</sup> 10-15 | -0.7<br>(-0.9 to -0.6)                                     | -0.4<br>(-0.5 to -0.3) | -0.1<br>(-0.1 to -0.0) | -1.5<br>(-1.7 to -1.3) | 5.7<br>(5.3 to 6.0)    |
| Weeks 27-48*<br>COVID <sup>c</sup> 15+   | -0.7<br>(-0.9 to -0.5)                                     | -0.3<br>(-0.4 to -0.2) | -0.2<br>(-0.3 to -0.1) | -2.3<br>(-2.5 to -2.0) | 12.4<br>(11.9 to 13.0) |
| Mean of 2019<br>occupancy                | 11.1                                                       | 5.7                    | 4.2                    | 19.7                   | 39.4                   |
| N                                        | 374880                                                     | 374880                 | 374880                 | 374880                 | 374880                 |

- <sup>a</sup> Data are from the Agency for Healthcare Research and Quality Healthcare Cost and Utilization Project State Inpatient Databases (2019-2020) for 45 US states.
- <sup>b</sup> Regressions compared outcomes for each hospital-week of 2020 to the corresponding hospital-week in 2019, i.e., regression models included hospital-week fixed effects. Means and regressions were weighted by the number of admissions for each hospital in 2019.
- <sup>c</sup> COVID denotes weekly COVID-19 admissions per 100 beds.
- <sup>d</sup> M/SUD denotes mental health and substance use disorders.

**eFigure 1.** Distribution of Duration of Periods With High COVID-19 Admissions<sup>a,b</sup>

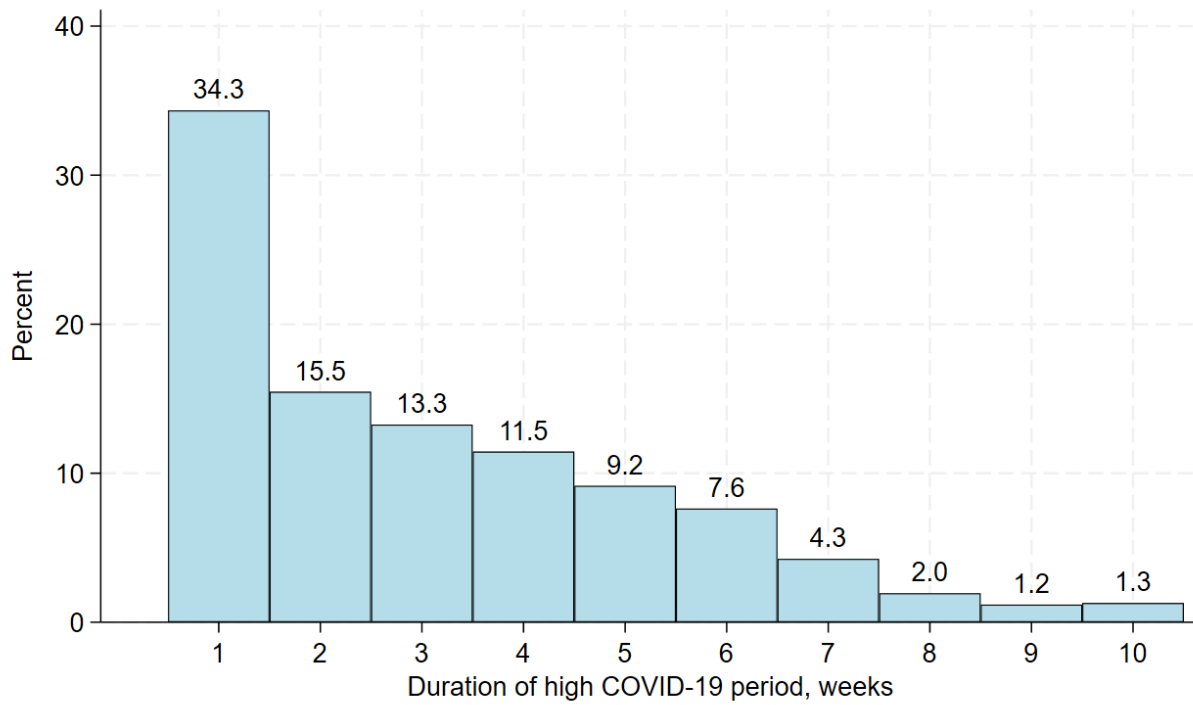

<sup>a</sup> Data are from the Agency for Healthcare Research and Quality Healthcare Cost and Utilization Project State Inpatient Databases (2019-2020) for 45 US states.

<sup>b</sup> A period of high COVID-19 is defined as a set of consecutive weeks with high COVID-19 admissions for a given hospital. Duration is calculated starting from the first week with high COVID-19 in each period. Each hospital may contribute more than one period with high COVID-19. Weighted by number of admissions in 2019 for each hospital. Time frame: 2020, weeks 1-48. More than 10 weeks mapped to 10.



**eFigure 2.** Percentage of Hospitals With High COVID-19 Admission Rates by Week in 2020<sup>a,b,c</sup>

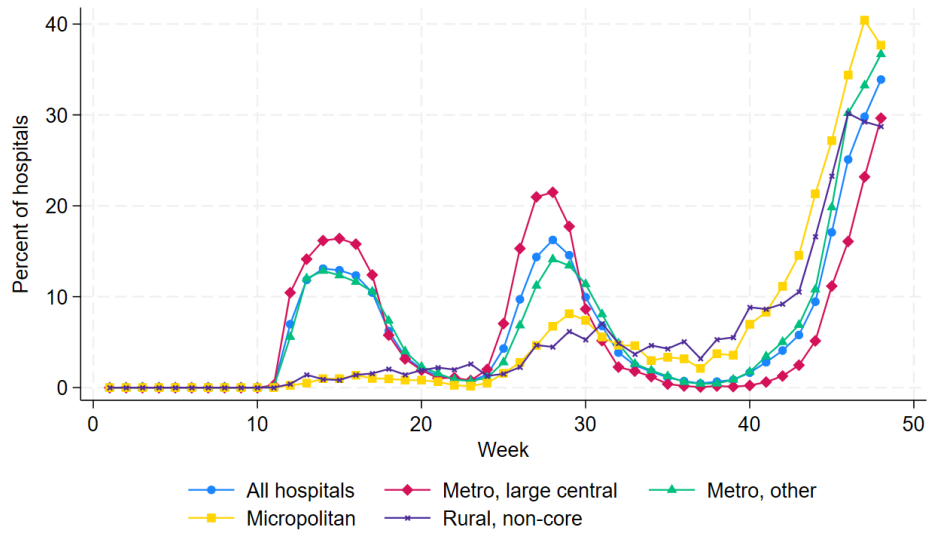

<sup>a</sup> Data are from the Agency for Healthcare Research and Quality Healthcare Cost and Utilization Project State Inpatient Databases (2019-2020) for 45 US states.

<sup>b</sup> High COVID-19 admission rate corresponds to 15 or more weekly COVID-19 admissions per 100 beds.

<sup>c</sup> Weighted by number of admissions in 2019 for each hospital.
