# Supplementary material for: COVID-19 Admission Rates and Changes in US Hospital Inpatient and Intensive Care Unit Occupancy
Source: PubMed Central journal article supplement (PMC10692846; doi:10.1001/jamahealthforum.2023.4206), 2023-12-01
Supplement: jamahealthforum-e234206-s002.pdf [file jamahealthforum-e234206-s002.pdf]

## Data Sharing Statement

Meille. COVID-19 Admission Rates and Changes in US Hospital Inpatient and Intensive Care Unit Occupancy. *JAMA Health Forum*. Published December 01, 2023.

doi:10.1001/jamahealthforum.2023.4206

### Data

**Data available:** No

### Additional Information

**Explanation for why data not available:** This study used restricted data from the Healthcare Cost and Utilization Project (HCUP). It contained exact admission dates, which cannot be publicly shared because of restrictions in the data use agreement between the Agency for Healthcare Research and Quality and HCUP partner states.
